# Supplementary material for: Accelerating long-read analysis on modern CPUs
Source: bioRxiv or medRxiv preprint supplement (doi:10.1101/2021.07.21.453294), 2022-02-03
Supplement: Supplementary file [file media-1.pdf]

## Supplementary Data

**Table S1** Architectural specifications of three processors: Skylake, Cascade Lake, and Ice Lake which were used for the experiments.

|                               | Intel® Xeon®<br>Platinum<br>8180<br>Skylake | Intel® Xeon®<br>Platinum<br>8280<br>Cascade Lake | Intel® Xeon®<br>Platinum<br>8360Y<br>Ice Lake |
|-------------------------------|---------------------------------------------|--------------------------------------------------|-----------------------------------------------|
| Sockets × Cores × Threads     | 1 × 28 × 2                                  | 1 × 28 × 2                                       | 1 × 36 × 2                                    |
| AVX register width (bits)     | 512, 256, 128                               | 512, 256, 128                                    | 512, 256, 128                                 |
| Vector Processing Units (VPU) | 2/Core                                      | 2/Core                                           | 2/Core                                        |
| Base Clock Frequency (GHz)    | 2.5                                         | 2.7                                              | 2.4                                           |
| L1D/L2 Cache (KB)             | 32/1024                                     | 32/1024                                          | 48/1280                                       |
| L3 Cache (MB) / Socket        | 38.5                                        | 38.5                                             | 54                                            |
| DRAM (GB) / Socket            | 96                                          | 96                                               | 132                                           |
| Bandwidth (GB/s) / Socket     | 112                                         | 128                                              | 204                                           |
| Compiler Version              | ICPC v. 19.1.3.304                          | ICPC v. 19.1.3.304                               | ICPC v. 19.1.3.304                            |

**Table S2** Memory-consumption (GB) of minimap2 and mm2-fast evaluated with various datasets using 28-core multi-threaded execution.

| Query dataset          | minimap2 | mm2-fast |
|------------------------|----------|----------|
| ONT: HG002             | 33.5     | 34.1     |
| PacBio CLR: HG002      | 23.2     | 23.5     |
| PacBio HiFi: HG002     | 28.1     | 30.3     |
| Assembly: HG002 (hap2) | 28.9     | 29.3     |

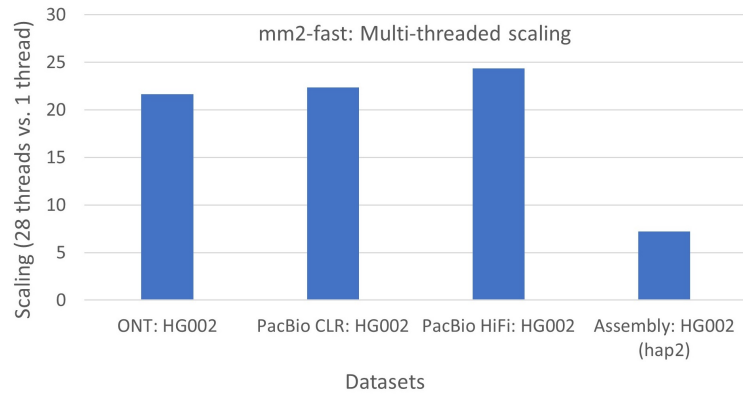

**Figure S1** Speedups achieved using multi-threaded execution of mm2-fast using single socket with 28 cores. X-axis shows query datasets used, and y-axis shows the ratio of single threaded execution time and 28-core execution time.

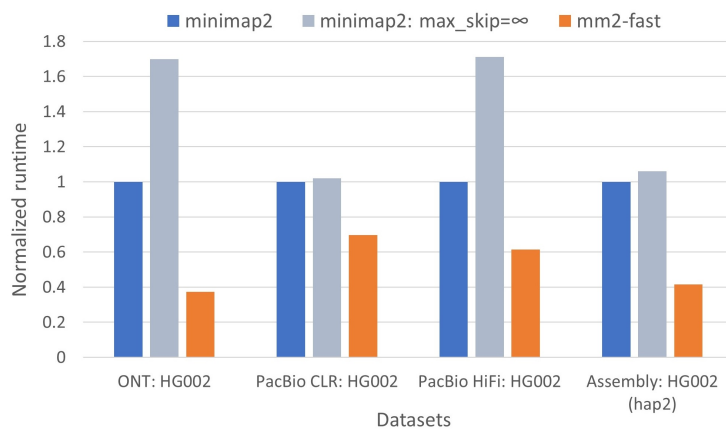

**Figure S2** Performance comparison of mm2-fast against minimap2 as well as a version of minimap2 in which its *max\_skip* chaining heuristic is disabled by setting *max\_skip* parameter to  $\infty$ . X-axis shows various datasets used, and y-axis is the normalized time with respect to the mapping time taken by minimap2. Minimap2 slows down by up to  $1.7\times$  (ONT and HiFi datasets) when its *max\_skip* heuristic is turned off.

### Supplementary Note1: Correctness check

We ensure that minimap2 (v2.18) and mm2-fast produce identical output. Minimap2 uses *max\_skip* heuristic to speed up the performance at the cost of the chaining accuracy. The default minimap2 configuration uses *max\_skip*=25. For better accuracy, *max\_skip* can be set to a higher value using the command-line flag `--max-chain-skip`. A larger value of *max\_skip* heuristic provides better mapping accuracy. We do not use the *max\_skip* heuristic in our vectorized chaining implementation. Therefore, the output of mm2-fast should match the most accurate mapping output of minimap2, i.e., with *max\_skip* heuristic disabled. For verifying the correctness of mm2-fast, minimap2 should run with `--max-chain-skip=∞`. Following are the steps to verify the correctness of mm2-fast. The example commands below use sample filenames *ref-seq* and *read-seq* for a reference sequence and a read sequence files respectively, and *map-ont* as a preset parameter.

#### Clone minimap2 (v2.18):

```
git clone https://github.com/lh3/minimap2.git -b v2.18
```

#### Compile and run:

```
cd minimap2 && make
./minimap2 -ax map-ont ref-seq read-seq --max-chain-skip=1000000 > minimap2_output
```

#### Clone mm2-fast:

```
git clone --recursive https://github.com/lh3/minimap2.git -b fast-contrib mm2-fast-contrib
```

#### Compile:

```
cd mm2-fast-contrib && make multi
```

The above command should generate three executable files: 1. `mm2-fast` 2. `mm2-fast-lhash` 3. `mm2-fast-no-opt`. By default, `mm2-fast` applies two optimizations, AVX512 based chaining and AVX2/AVX512 based alignment. On top of these two optimizations, `mm2-fast-lhash` uses learned hash tables. The optimizations in `mm2-fast` require architectural support of AVX2/AVX512. In the absence of AVX2/AVX512, `mm2-fast-no-opt` can be used to run with all optimizations turned off.

#### 0.1 Correctness check with mm2-fast

##### Run mm2-fast

```
./mm2-fast -ax map-ont ref-seq read-seq > mm2-fast_output
```

##### Match output files

```
diff minimap2_output mm2-fast_output > diff_result
```

The file `diff_result` should show a clean-diff with the difference of 2 lines, i.e., the lines containing the command-line parameters for minimap2 and mm2-fast.

#### Enabling learned hash tables

To make the correctness verification seamless, by default, we have disabled learned hash tables as it requires an additional installation. Learned hash-table uses an external training library that runs on *Rust*. Following are the steps to enable learned hash table optimization in mm2-fast:

- Install Rust and add installation path to `.bashrc` file. This is fairly quick and can be done by a single command given at <https://rustup.rs/>.
- Create learned hash table index for a reference sequence and a preset parameter (say `map-ont`).

```
./build_rmi.sh ref-seq map-ont
```

Index building is one-time task for a reference sequence and a preset parameter, and can be reused for all subsequent executions. Note that, for a given reference sequence, the hash index changes with difference preset parameters.

- Once the index is built, run `mm2-fast-lhash`.

```
./mm2-fast-lhash -ax map-ont ref-seq read-seq > mm2-fast-lhash_output
```

The output file `mm2-fast-lhash_output` should also be identical to `minimap2_output` file produced above.
